# Supplementary material for: Multistimuli-responsive materials based on a zinc(ii) complex with high-contrast and multicolor switching
Source: Royal Society of Chemistry journal article supplement (doi:10.1039/d2dt02435g), 2022-01-01

## Supporting Information

# Multistimuli-responsive Materials Based on Zinc(II) Complex with High-contrast and Multicolor Switching

Han-Wen Zheng,<sup>‡</sup> Dong-Dong Yang,<sup>‡</sup> Yong-Sheng Shi, Tong Xiao, Xiang-Jun Zheng\*

Beijing Key Laboratory of Energy Conversion and Storage Materials, College of Chemistry, Beijing Normal University, Beijing, 100875, China.

**Corresponding author:**

Tel.: +86-10-58805522; fax: +86-10-58802075.

E-mail address: [xjzheng@bnu.edu.cn](mailto:xjzheng@bnu.edu.cn) (X. -J. Zheng)

## Contents

|                                                                                                                                                                                                                                         |   |
|-----------------------------------------------------------------------------------------------------------------------------------------------------------------------------------------------------------------------------------------|---|
| <b>Fig. S1</b> Multiple intramolecular and intermolecular interactions in complex <b>1</b> .....                                                                                                                                        | 3 |
| <b>Fig. S2</b> Fluorescence decay curves and fit results of complex <b>1</b> in different states: (a) Original sample monitored at 525 nm. (b) Highly ground sample monitored at 625 nm. (c) Fumed sample monitored at 530 nm.....      | 3 |
| <b>Fig. S3</b> (a) Emission spectra and (b) emission switching characteristics of complex <b>1</b> upon repeating the grinding and fuming processes.....                                                                                | 3 |
| <b>Fig. S4</b> PXRD patterns of the simulation of complex <b>1</b> and the samples before and after grinding, fuming under ethanol vapor.....                                                                                           | 4 |
| <b>Fig. S5</b> TG curve of (a) Original and (b) Highly ground samples of complex <b>1</b> .....                                                                                                                                         | 4 |
| <b>Fig. S6</b> UV–Vis absorption spectra of the original crystals of ligand HL, <b>1</b> before and after exposing to HCl/NH <sub>3</sub> vapor, (a) in solid state, (b) in THF solution.....                                           | 4 |
| <b>Fig. S7</b> (a) Emission spectra and (b) emission switching characteristics of complex <b>1</b> upon repeating the HCl–NH <sub>3</sub> fumigation processes.....                                                                     | 5 |
| <b>Fig. S8</b> PXRD patterns of complex <b>1</b> upon HCl / NH <sub>3</sub> fumigation processes.....                                                                                                                                   | 5 |
| <b>Fig. S9</b> DLS data of complex <b>1</b> (10 μM) in THF/H <sub>2</sub> O: (a) 70% H <sub>2</sub> O, (b) 80% H <sub>2</sub> O and (c) 90% H <sub>2</sub> O.....                                                                       | 5 |
| <b>Fig. S10</b> (a) Emission spectra (excited at 365 nm). (b) Fluorescence decay curves and fit results. (c) Photographs under ambient light and UV (365 nm) light of the aggregates and highly ground sample of complex <b>1</b> ..... | 6 |
| <b>Fig. S11</b> PXRD patterns of original crystals, highly ground and aggregates samples of complex <b>1</b> .....                                                                                                                      | 6 |
| <b>Fig. S12</b> (a) Cyclic voltammogram and (b) UV-Vis absorption spectra of electrochemical devices (ECD) assembled by complex <b>1</b> .....                                                                                          | 7 |
| <b>Fig. S13</b> (a) Cyclic voltammogram of electrochemical devices (ECD) assembled by TPE-NH <sub>2</sub> and complex <b>1</b> . (b) Photographs of the color changes of ECD assembled by TPE-NH <sub>2</sub> . .....                   | 7 |
| <b>Fig. S14</b> Photographs of complex <b>1</b> film taken under ambient light before and after fuming with HCl/NH <sub>3</sub> vapor.....                                                                                              | 7 |
| <b>Table S1</b> Crystal data and structure refinement parameters of complex <b>1</b> .....                                                                                                                                              | 8 |
| <b>Table S2</b> Selected Bond Lengths (Å) and Angles (deg) of complex <b>1</b> .....                                                                                                                                                    | 8 |
| <b>Table S3</b> Types of intramolecular and intermolecular interactions and corresponding distances and angles in complex <b>1</b> .....                                                                                                | 9 |
| <b>Table S4</b> The dihedral angles between different planes in complex <b>1</b> .....                                                                                                                                                  | 9 |

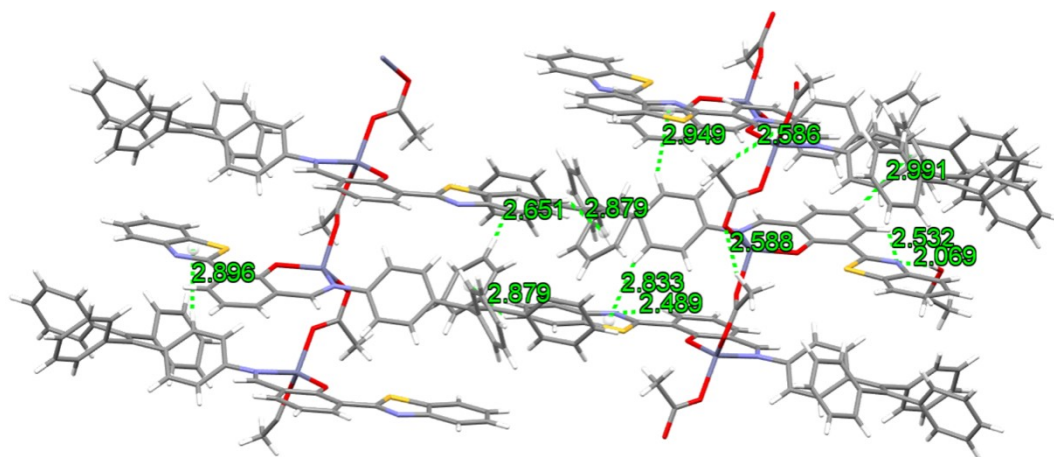

**Fig. S1** Multiple intramolecular and intermolecular interactions in complex **1**.

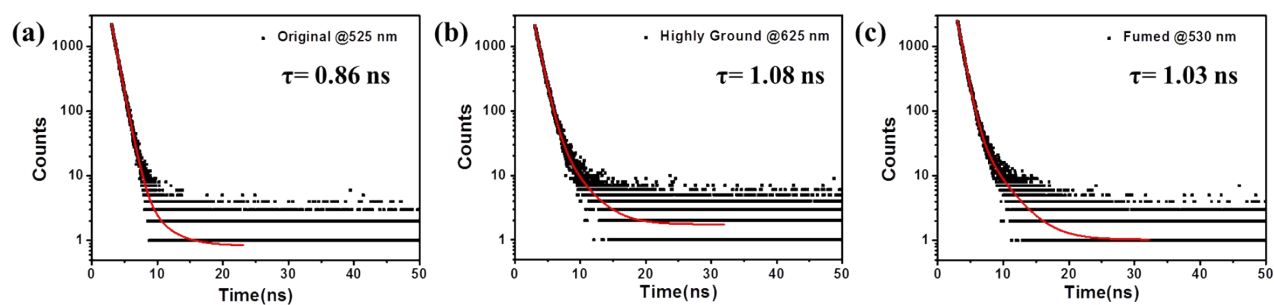

**Fig. S2** Fluorescence decay curves and fit results of complex **1** in different states: (a) Original sample monitored at 525 nm. (b) Highly ground sample monitored at 625 nm. (c) Fumed sample monitored at 530 nm.

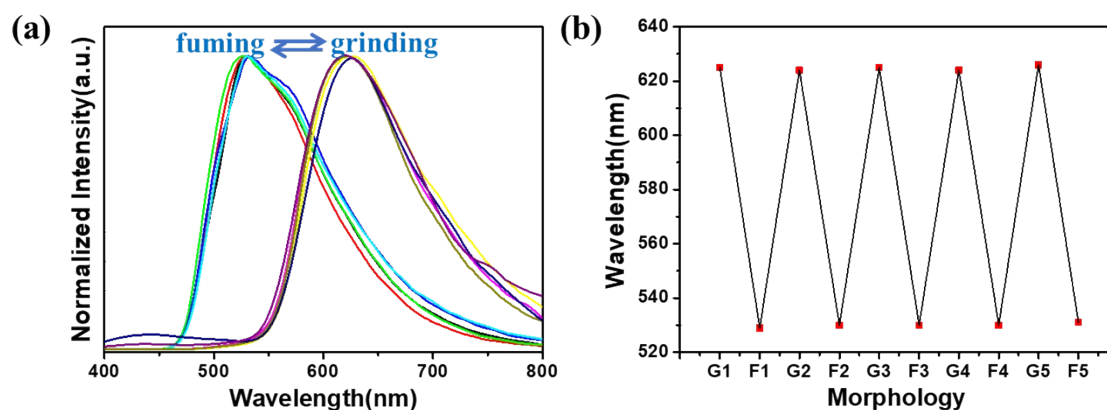

**Fig. S3** (a) Emission spectra and (b) emission switching characteristics of complex **1** upon repeating the grinding and fuming processes.

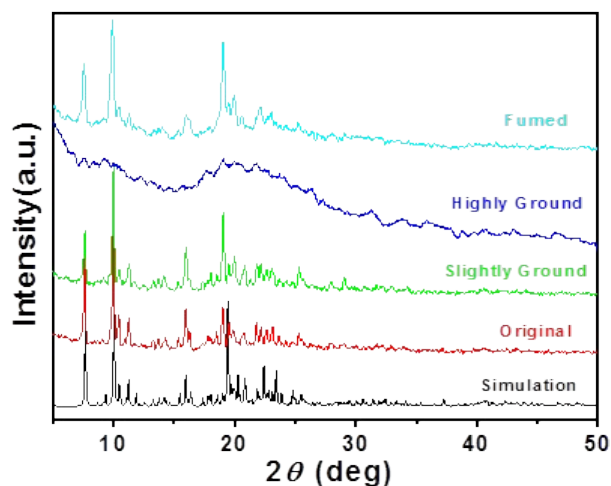

**Fig. S4** PXR D patterns of the simulation of complex **1** and the samples before and after grinding, fuming under ethanol vapor.

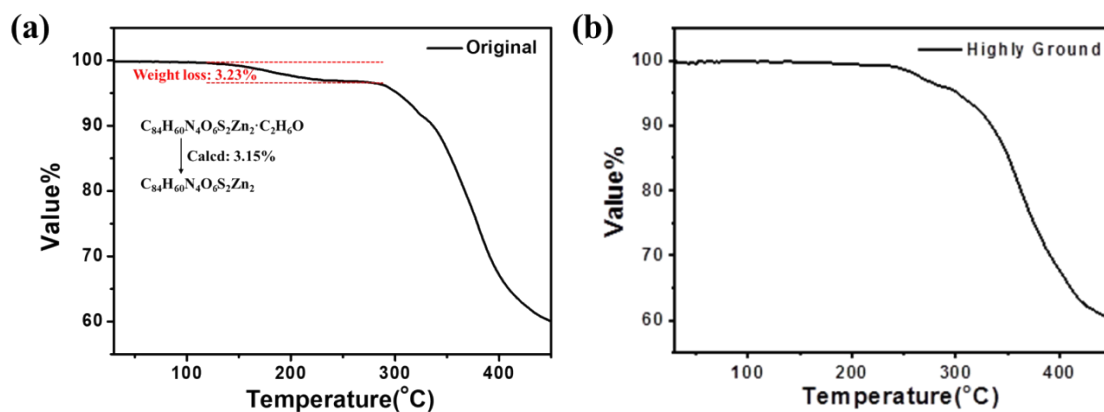

**Fig. S5** TG curve of (a) Original and (b) Highly ground samples of complex **1**.

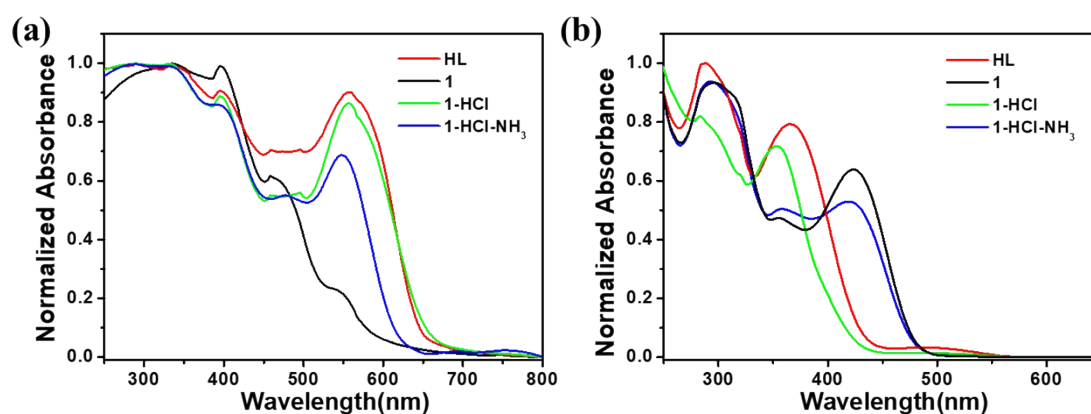

**Fig. S6** UV-Vis absorption spectra of the original crystals of ligand HL, **1** before and after exposing to HCl/NH<sub>3</sub> vapor, (a) in solid state, (b) in THF solution.

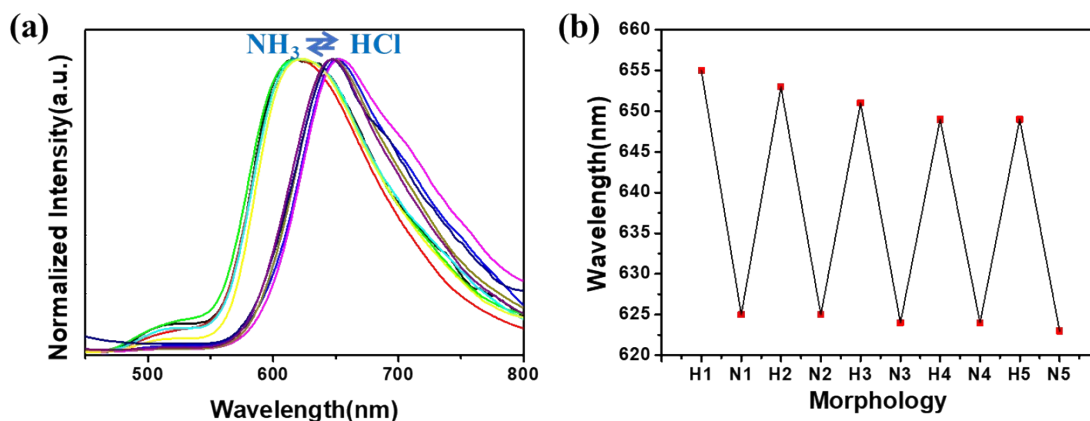

**Fig. S7** (a) Emission spectra and (b) emission switching characteristics of complex **1** upon repeating the HCl–NH<sub>3</sub> fumigation processes.

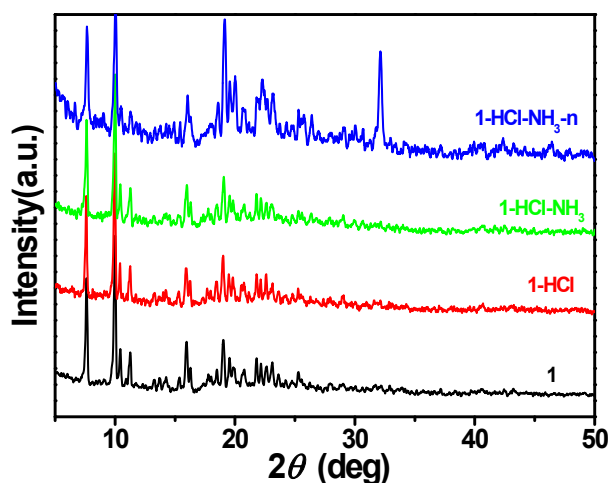

**Fig. S8** PXRD patterns of complex **1** upon HCl / NH<sub>3</sub> fumigation processes.

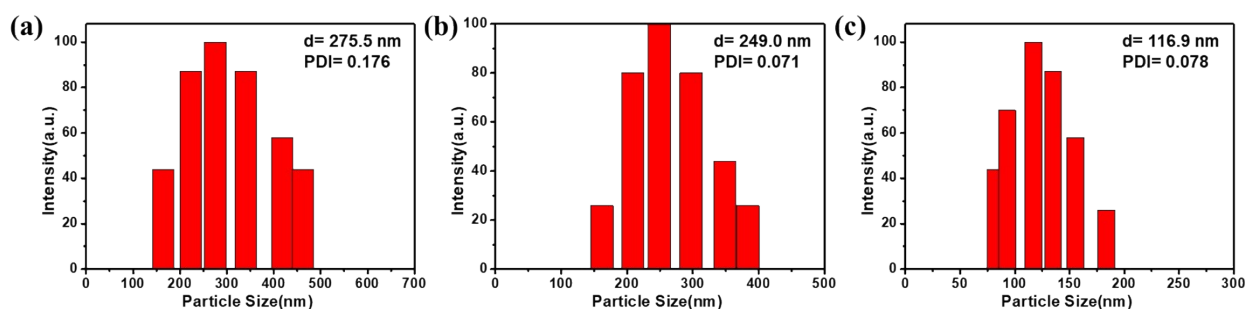

**Fig. S9** DLS data of complex **1** (10 μM) in THF/H<sub>2</sub>O: (a) 70% H<sub>2</sub>O, (b) 80% H<sub>2</sub>O and (c) 90% H<sub>2</sub>O.

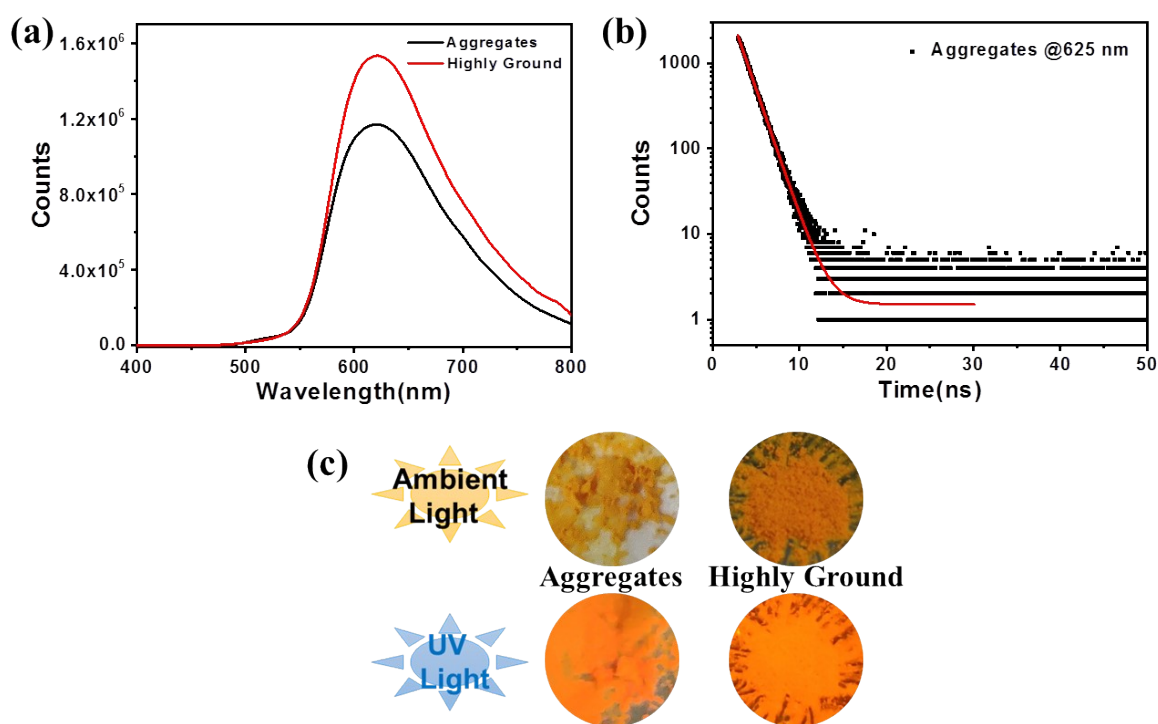

**Fig. S10** (a) Emission spectra (excited at 365 nm). (b) Fluorescence decay curves and fit results. (c) Photographs under ambient light and UV (365 nm) light of the aggregates and highly ground sample of complex 1.

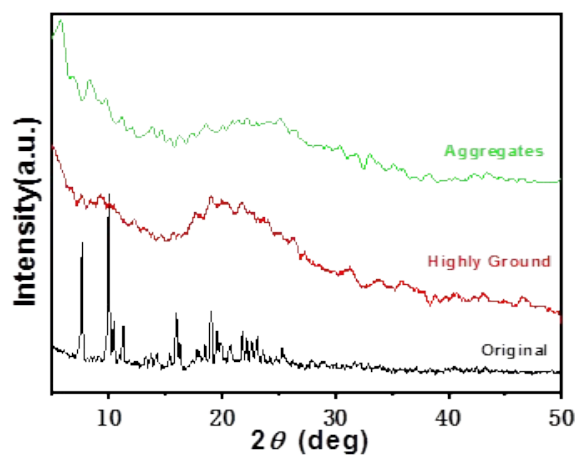

**Fig. S11** PXRD patterns of original crystals, highly ground and aggregates samples of complex 1.

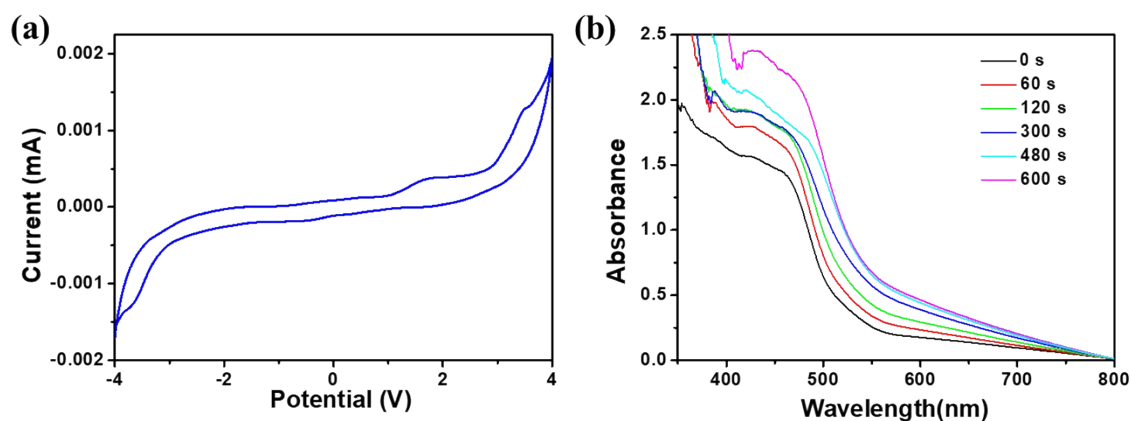

**Fig. S12** (a) Cyclic voltammogram and (b) UV-Vis absorption spectra of electrochemical devices (ECD) assembled by complex **1**.

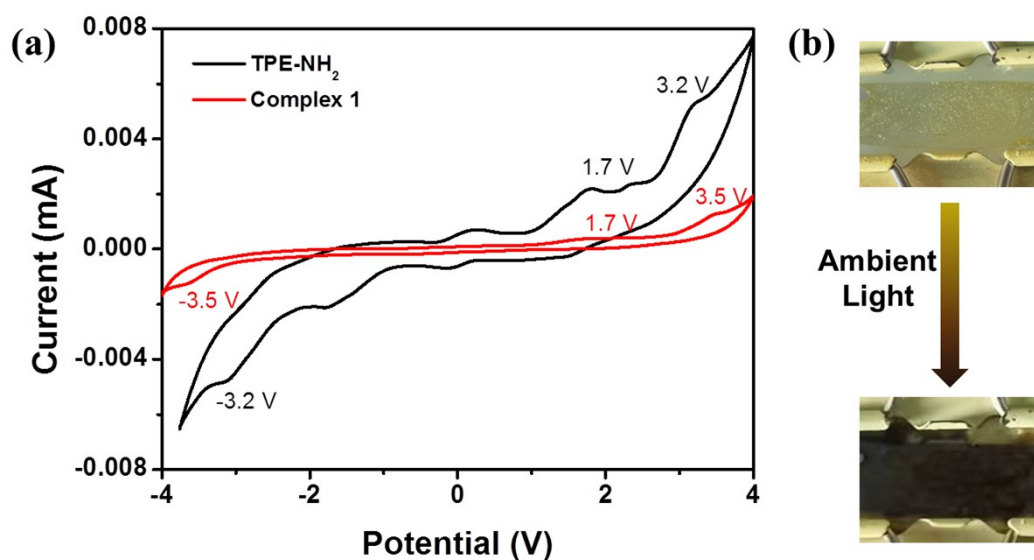

**Fig. S13** (a) Cyclic voltammogram of electrochemical devices (ECD) assembled by TPE-NH<sub>2</sub> and complex **1**. (b) Photographs of the color changes of ECD assembled by TPE-NH<sub>2</sub>.

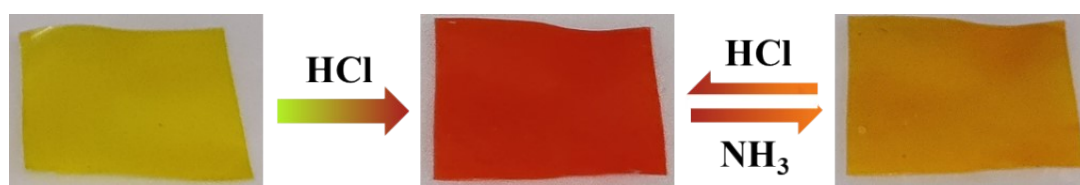

**Fig. S14** Photographs of complex **1** film taken under ambient light before and after fuming with HCl/NH<sub>3</sub> vapor.

**Table S1** Crystal data and structure refinement parameters of complex **1**.

| Compound                                                     | <b>1</b>                                                                                     |
|--------------------------------------------------------------|----------------------------------------------------------------------------------------------|
| Empirical formula                                            | C <sub>86</sub> H <sub>66</sub> N <sub>4</sub> O <sub>7</sub> S <sub>2</sub> Zn <sub>2</sub> |
| Formula weight                                               | 1462.28                                                                                      |
| Temperature/K                                                | 100.00(10)                                                                                   |
| Crystal system                                               | Triclinic                                                                                    |
| Space group                                                  | <i>P</i> $\bar{1}$                                                                           |
| <i>a</i> /Å                                                  | 8.9256 (3)                                                                                   |
| <i>b</i> /Å                                                  | 19.1901 (4)                                                                                  |
| <i>c</i> /Å                                                  | 22.0658 (7)                                                                                  |
| $\alpha$ /°                                                  | 108.594 (2)                                                                                  |
| $\beta$ /°                                                   | 93.475 (3)                                                                                   |
| $\gamma$ /°                                                  | 94.909 (2)                                                                                   |
| Volume/Å <sup>3</sup>                                        | 3553.58 (19)                                                                                 |
| <i>Z</i>                                                     | 2                                                                                            |
| $\rho_{\text{calc}}$ /cm <sup>3</sup>                        | 1.367                                                                                        |
| $\mu$ /mm <sup>-1</sup>                                      | 1.864                                                                                        |
| F(000)                                                       | 1516.0                                                                                       |
| Radiation                                                    | CuK $\alpha$ ( $\lambda$ = 1.54184)                                                          |
| 2 $\theta$ range for data collection/°                       | 7.448 to 144.26                                                                              |
| Index ranges                                                 | -10 ≤ <i>h</i> ≤ 11, -16 ≤ <i>k</i> ≤ 23, -26 ≤ <i>l</i> ≤ 23                                |
| Reflections collected                                        | 24940                                                                                        |
| Independent reflections                                      | 13577 [ <i>R</i> <sub>int</sub> = 0.0664, <i>R</i> <sub>sigma</sub> = 0.0738]                |
| Data/restraints/parameters                                   | 13557/7/914                                                                                  |
| Goodness-of-fit on F <sup>2</sup>                            | 1.031                                                                                        |
| Final <i>R</i> indexes [ <i>I</i> ≥ 2 $\sigma$ ( <i>I</i> )] | <i>R</i> <sub>1</sub> = 0.0583, <i>wR</i> <sub>2</sub> = 0.1518                              |
| <i>R</i> indices (all data)                                  | <i>R</i> <sub>1</sub> = 0.0734, <i>wR</i> <sub>2</sub> = 0.1604                              |
| Largest diff. peak/hole (e Å <sup>-3</sup> )                 | 1.13/-0.89                                                                                   |
| CCDC number                                                  | 2191342                                                                                      |

**Table S2** Selected Bond Lengths (Å) and Angles (deg) of complex **1**.

|                      |             |                        |            |
|----------------------|-------------|------------------------|------------|
| Zn1—O1               | 1.912 (2)   | Zn2—O3                 | 1.923 (2)  |
| Zn1—O2               | 1.962 (2)   | Zn2—O4                 | 1.964 (2)  |
| Zn1—O5               | 1.963 (2)   | Zn2—O6 <sup>i</sup>    | 1.994 (2)  |
| O6—Zn2 <sup>ii</sup> | 1.994 (2)   | Zn2—N3                 | 2.005 (3)  |
| Zn1—N1               | 1.993 (2)   |                        |            |
| O1—Zn1—O2            | 130.09 (10) | O3—Zn2—O4              | 104.80 (9) |
| O1—Zn1—O5            | 103.58 (9)  | O3—Zn2—O6 <sup>i</sup> | 132.15 (9) |



|            |             |                          |             |
|------------|-------------|--------------------------|-------------|
| O1—Zn1—N1  | 97.95 (9)   | O3—Zn2—N3                | 96.76 (10)  |
| O2—Zn1—O5  | 102.15 (9)  | O4—Zn2—O6 <sup>i</sup>   | 97.42 (9)   |
| O2—Zn1—N1  | 110.56 (10) | O4—Zn2—N3                | 116.49 (9)  |
| O5—Zn1—N1  | 112.33 (10) | O6 <sup>i</sup> —Zn2—N3  | 110.38 (10) |
| C1—O1—Zn1  | 124.48 (19) | C83—O6—Zn2 <sup>ii</sup> | 106.89 (18) |
| C81—O2—Zn1 | 109.57 (19) | C14—N1—Zn1               | 120.4 (2)   |
| C41—O3—Zn2 | 125.3 (2)   | C15—N1—Zn1               | 120.36 (18) |
| C81—O4—Zn2 | 128.6 (2)   | C54—N3—Zn2               | 119.7 (2)   |
| C83—O5—Zn1 | 128.9 (2)   | C55—N3—Zn2               | 120.89 (18) |

Symmetry codes: (i)  $x-1, y, z$ ; (ii)  $x+1, y, z$ .

**Table S3** Types of intramolecular and intermolecular interactions and corresponding distances and angles in complex **1**.

| Interactions                                                                                                              | Distances (Å) | Angles (°) |
|---------------------------------------------------------------------------------------------------------------------------|---------------|------------|
| O <sub>7</sub> -H <sub>7</sub> ···N <sub>4</sub>                                                                          | 2.069         | 167.50     |
| C <sub>5</sub> -H <sub>5</sub> ···N <sub>2</sub>                                                                          | 2.489         | 101.08     |
| C <sub>45</sub> -H <sub>45</sub> ···N <sub>4</sub>                                                                        | 2.532         | 100.59     |
| C <sub>82</sub> -H <sub>82C</sub> ···O <sub>6</sub>                                                                       | 2.588         | 120.87     |
| C <sub>84</sub> -H <sub>84A</sub> ···O <sub>2</sub>                                                                       | 2.586         | 135.36     |
| C <sub>11</sub> -H <sub>11</sub> ···π(C <sub>69</sub> -C <sub>74</sub> )                                                  | 2.879         | 142.94     |
| C <sub>17</sub> -H <sub>17</sub> ···π(S <sub>2</sub> ,C <sub>47</sub> ,N <sub>4</sub> ,C <sub>48</sub> ,C <sub>53</sub> ) | 2.896         | 115.65     |
| C <sub>44</sub> -H <sub>44</sub> ···π(C <sub>62</sub> -C <sub>67</sub> )                                                  | 2.991         | 141.51     |
| C <sub>57</sub> -H <sub>57</sub> ···π(S <sub>1</sub> ,C <sub>7</sub> ,N <sub>2</sub> ,C <sub>8</sub> ,C <sub>13</sub> )   | 2.949         | 118.26     |
| C <sub>59</sub> -H <sub>59</sub> ···π(S <sub>1</sub> ,C <sub>7</sub> ,N <sub>2</sub> ,C <sub>8</sub> ,C <sub>13</sub> )   | 2.833         | 139.15     |
| C <sub>73</sub> -H <sub>73</sub> ···π(C <sub>75</sub> -C <sub>80</sub> )                                                  | 2.651         | 158.84     |

**Table S4** The dihedral angles between different planes in complex **1**.

|       |         |
|-------|---------|
| A/B   | 2.44 °  |
| B/C   | 44.24 ° |
| A/C   | 42.91 ° |
| A'/B' | 11.52 ° |
| B'/C' | 34.93 ° |
| A'/C' | 46.42 ° |

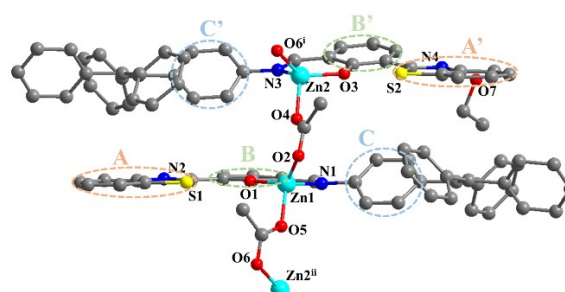

Supplement: d2dt02435g1.pdf [file d2dt02435g1.pdf]
